# Supplementary material
Source: HighWire-hosted journal article supplement (https://www.life-science-alliance.org/content/5/11/e202201568)

# RPA1

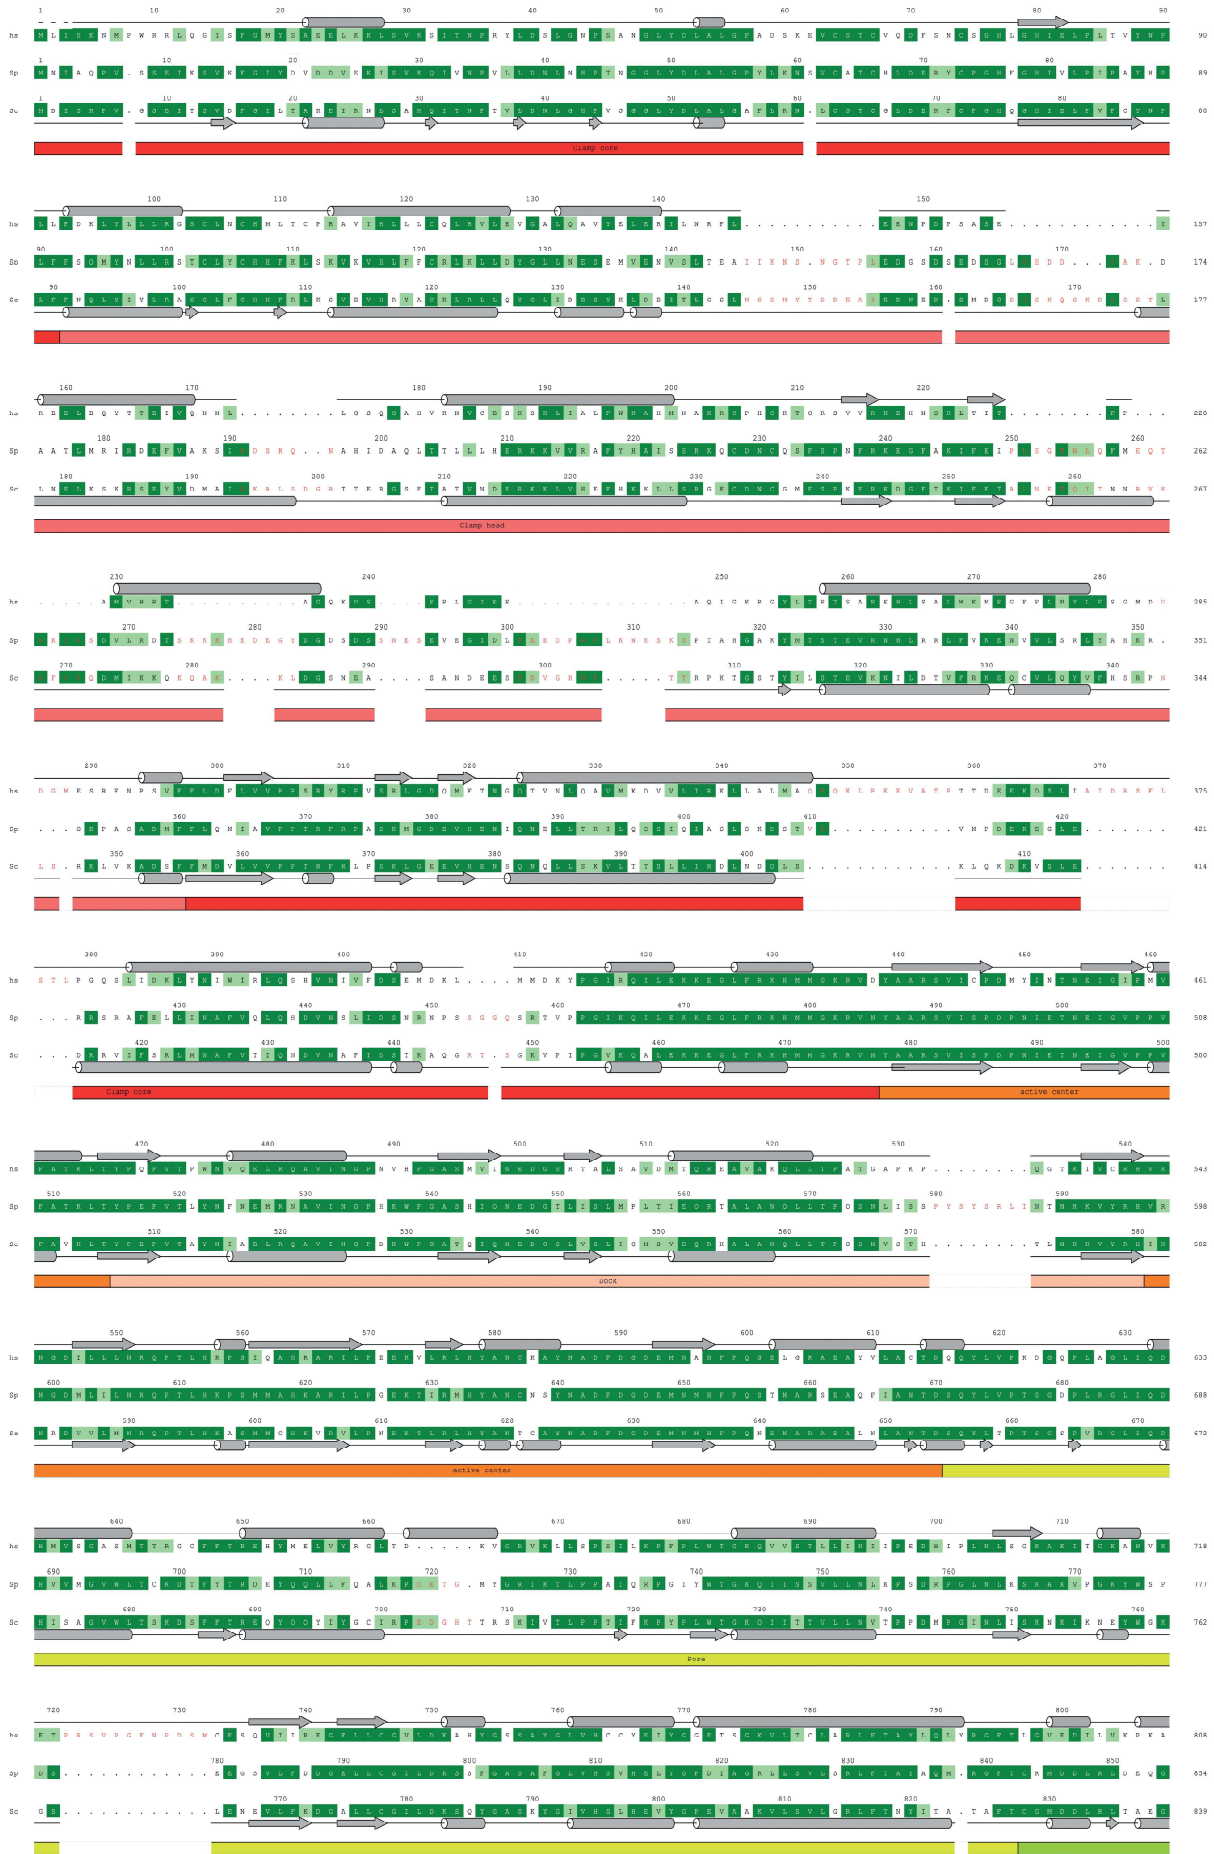

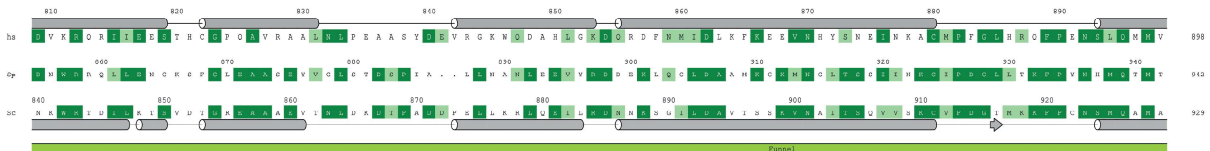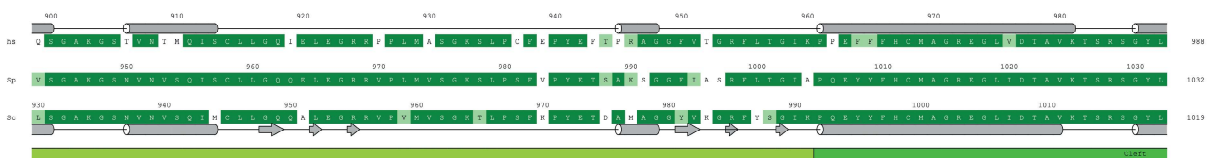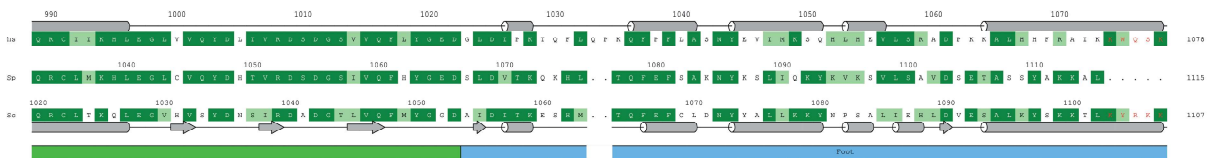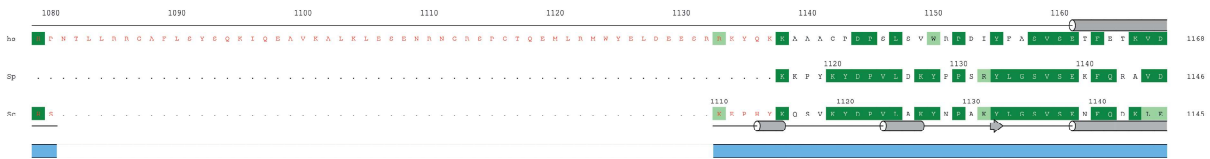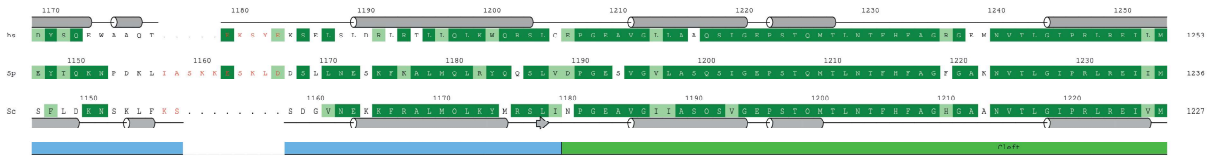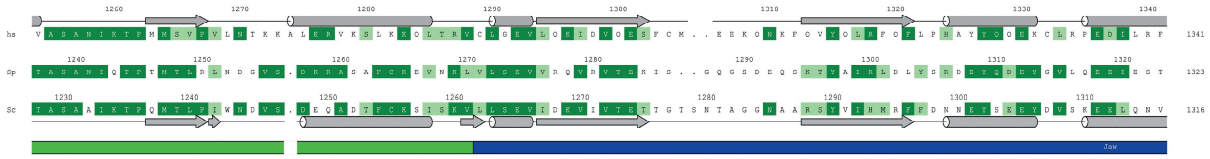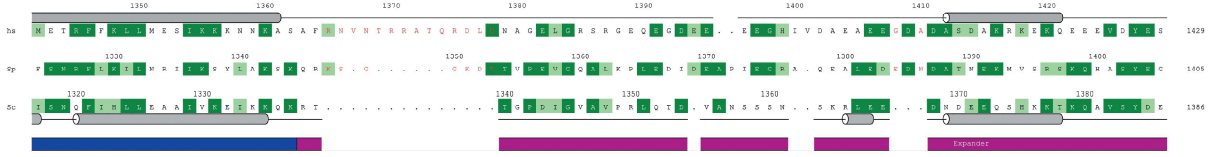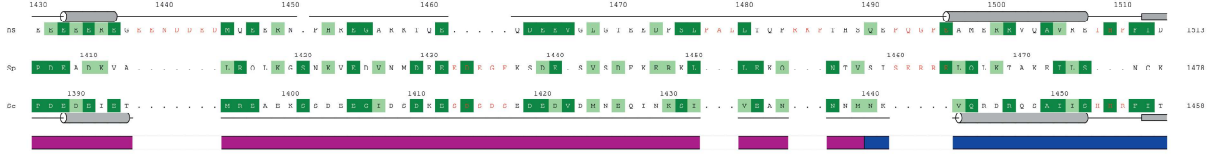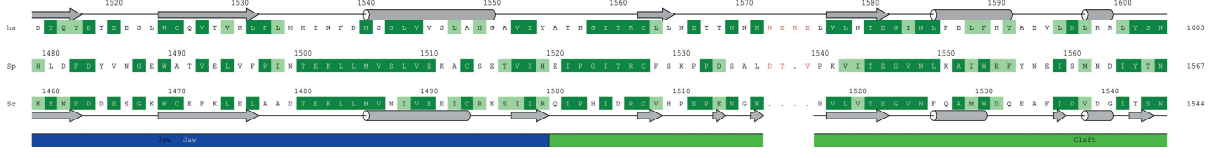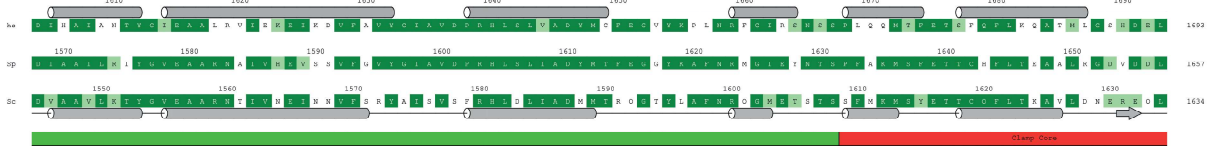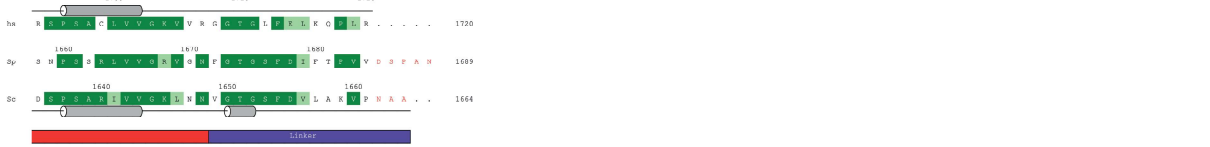

# RPA2

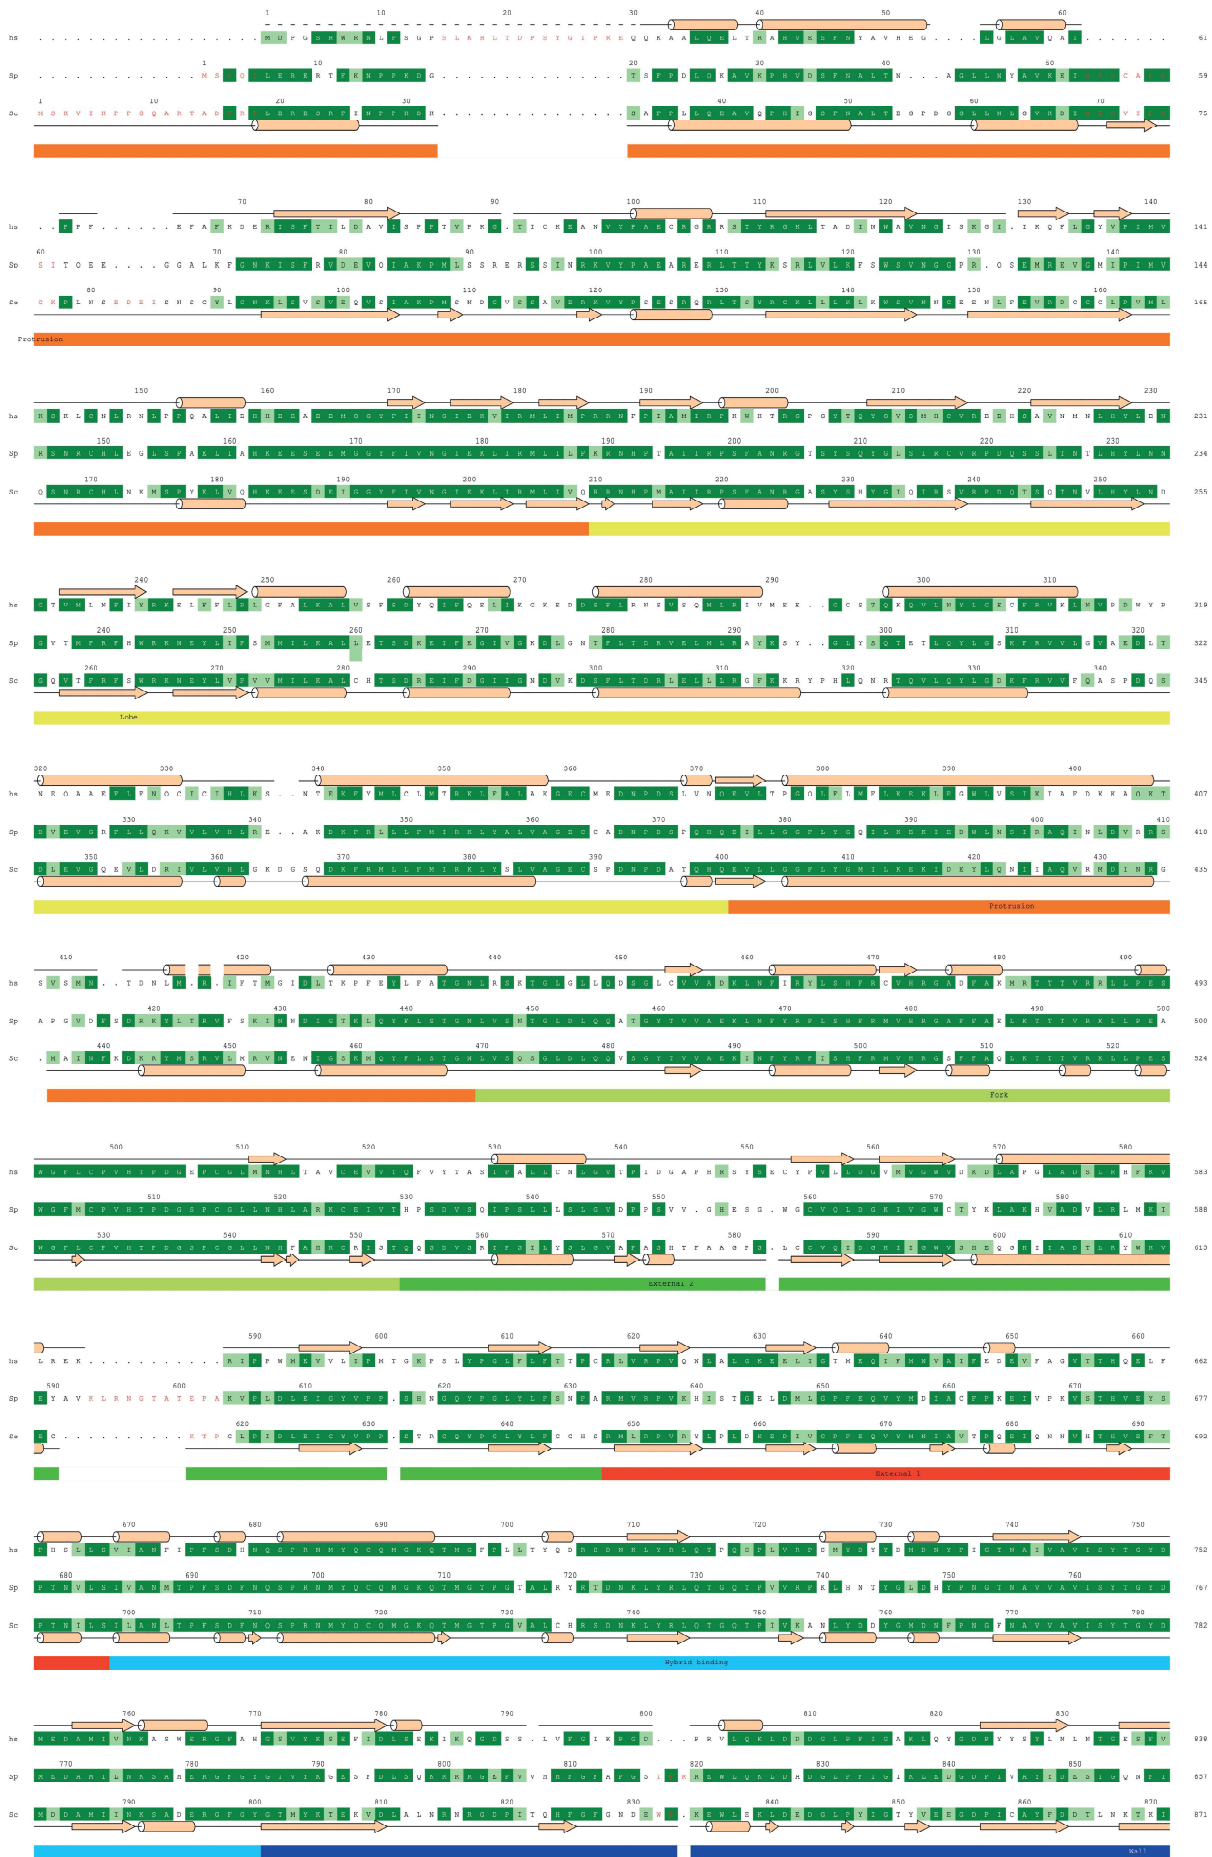

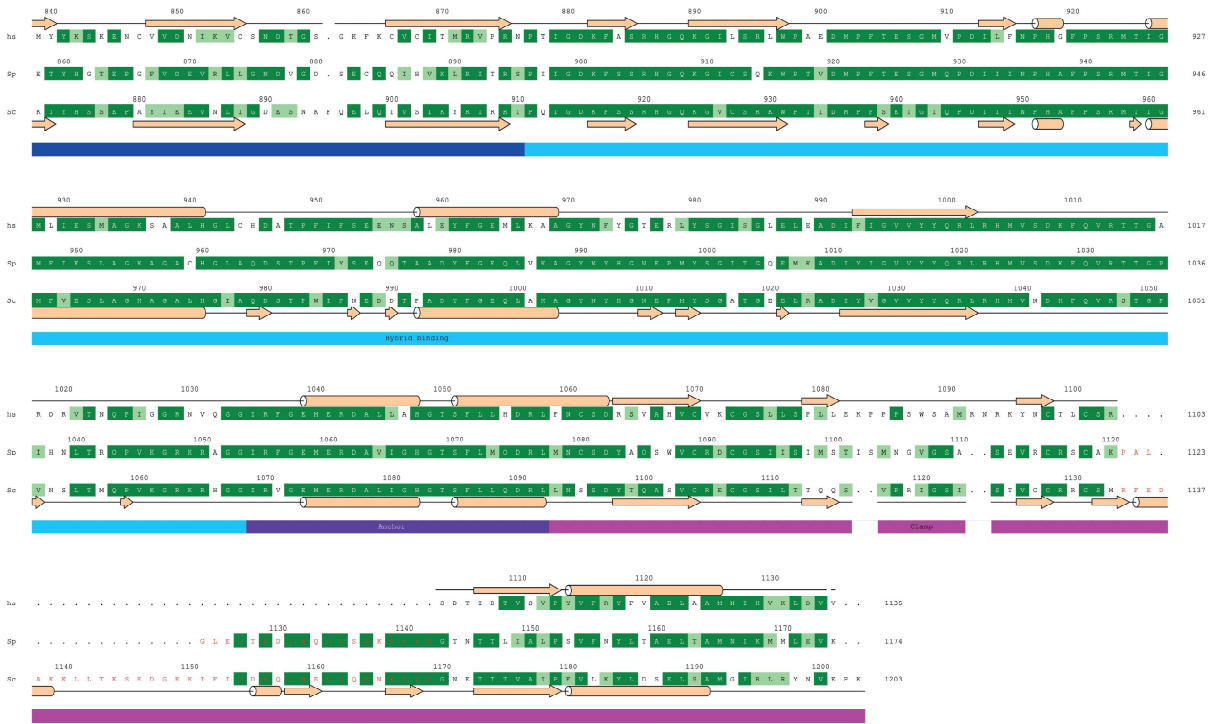

## RPAC1

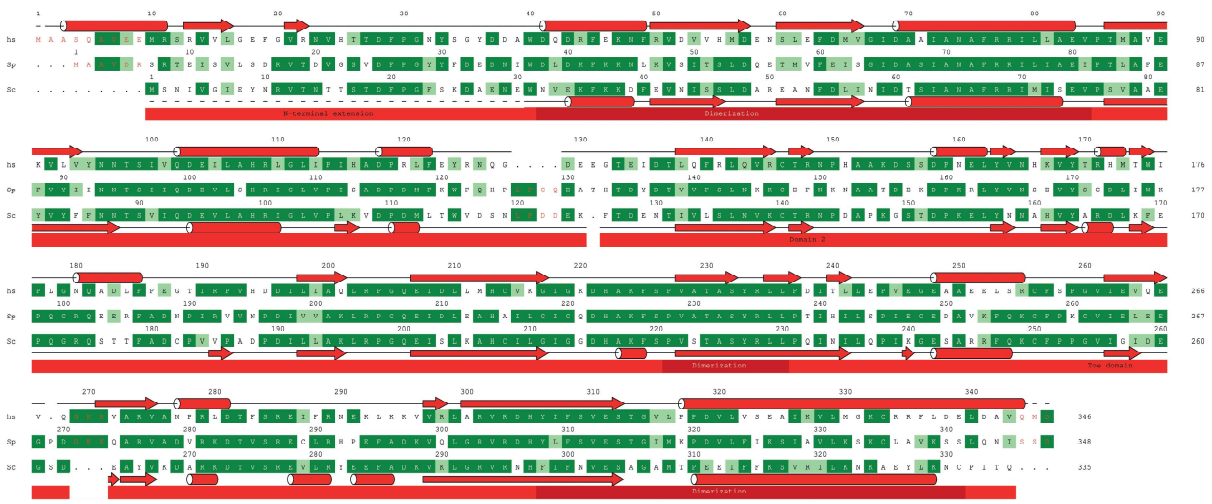

## RPAC2

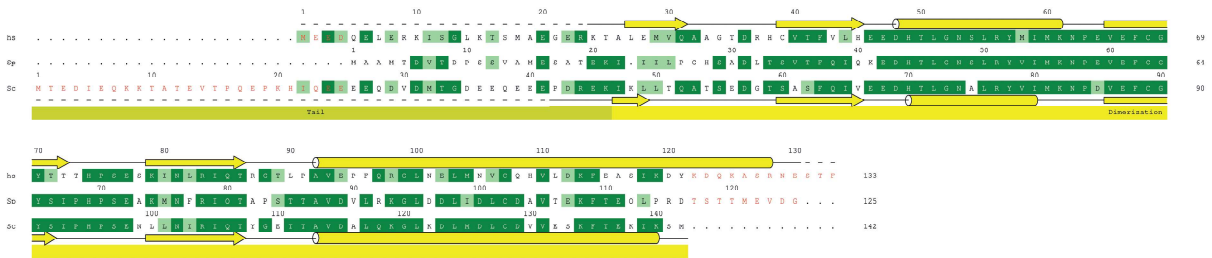

# RPA49

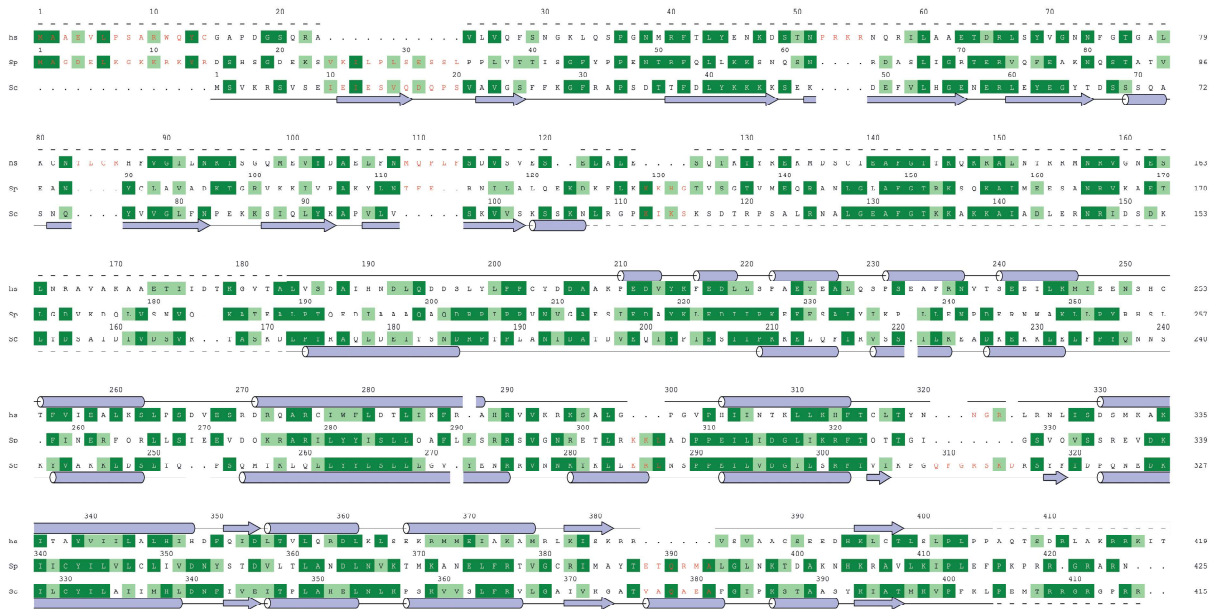

# RPA34

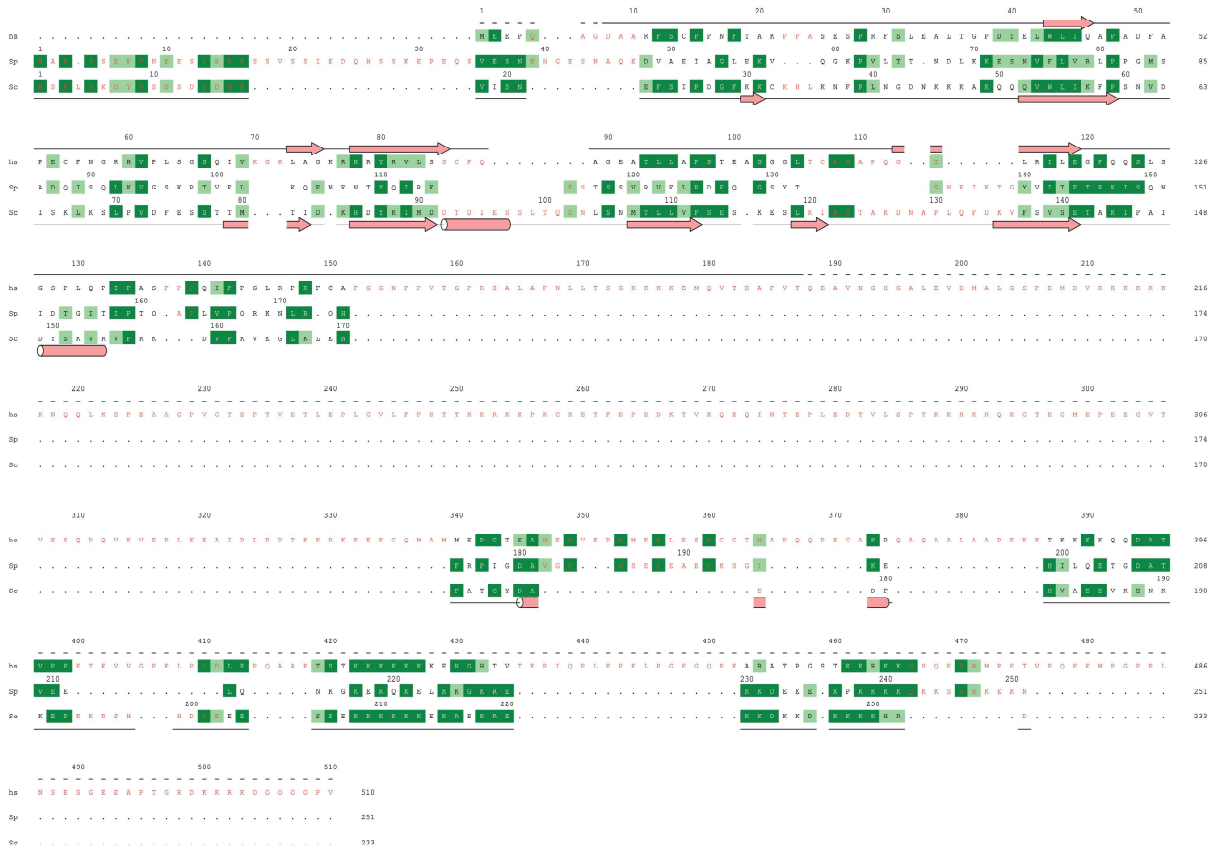

# RPA12

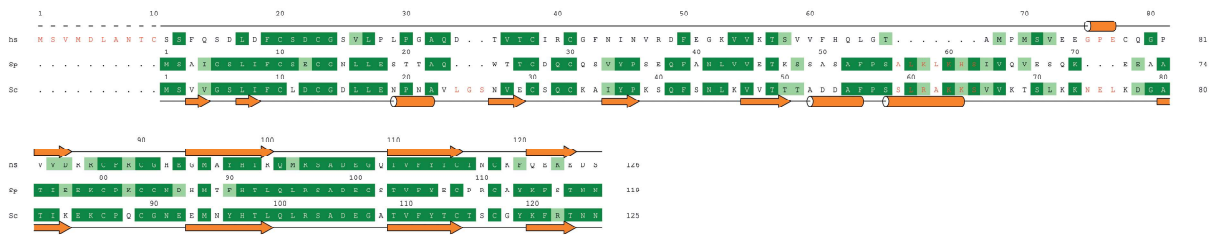

# RPABC1

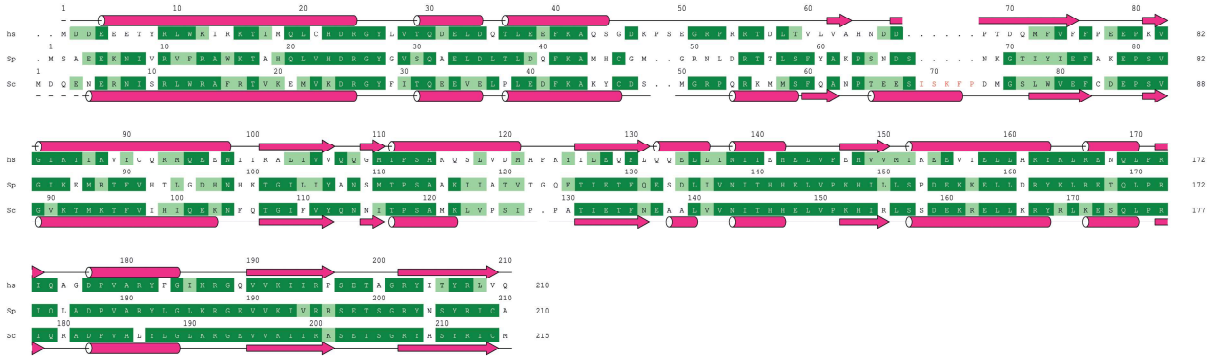

# RPABC2

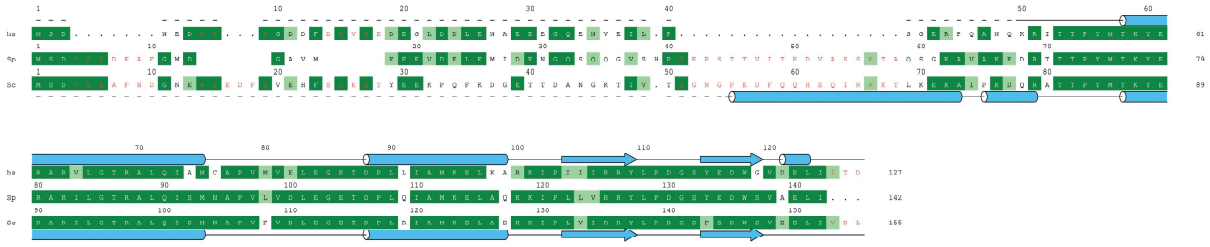

# RPABC3

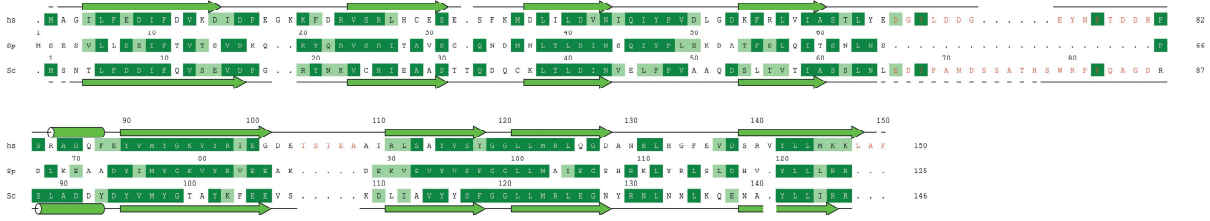

# RPABC4

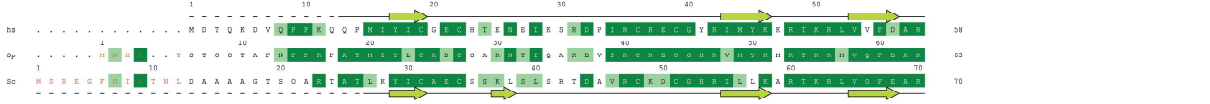

# RPABC5

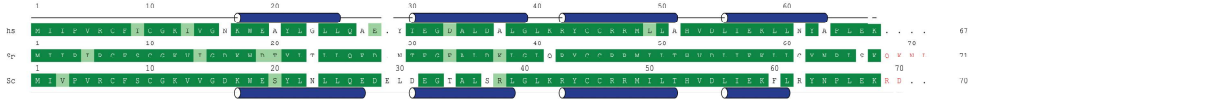

# RPA43

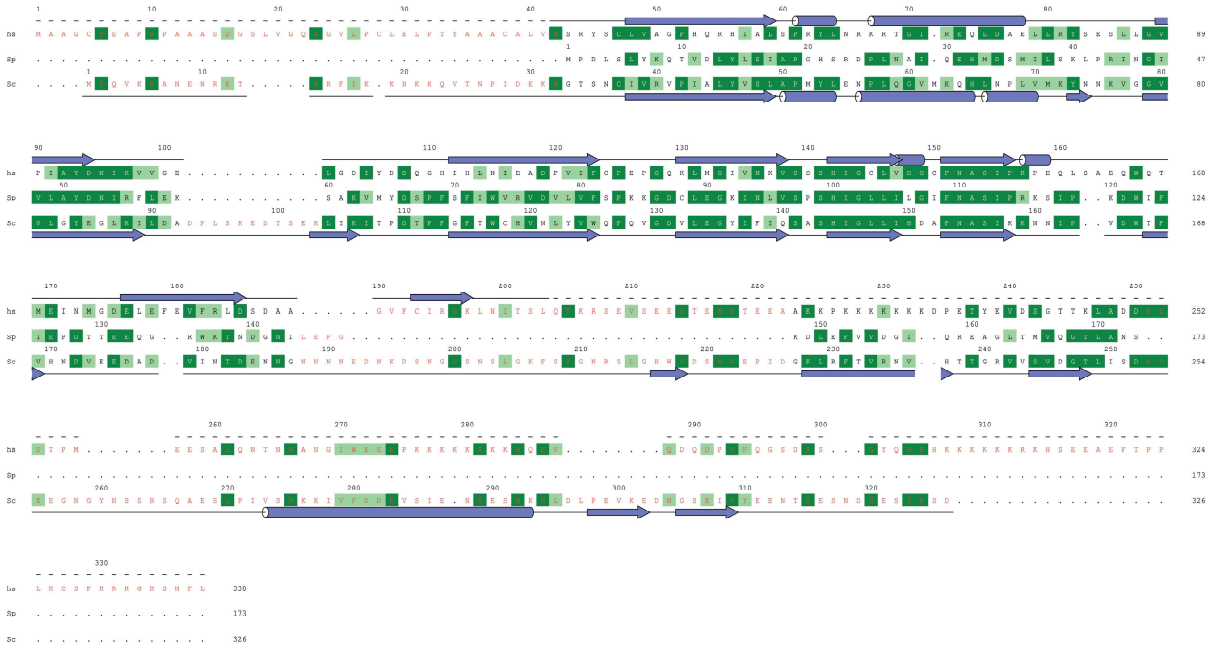

Supplement: inline-supplementary-material-3 [file inline-supplementary-material-3.pdf]
